# Supplementary material for: Interfacial molecular layer induced by trace chlorogenic acid for highly stable zinc anodes
Source: Royal Society of Chemistry journal article supplement (doi:10.1039/d5cc00327j), 2025-01-01
Supplement: d5cc00327j1.pdf [file d5cc00327j1.pdf]

Electronic Supplementary Material (ESI) for ChemComm.  
This journal is © The Royal Society of Chemistry 2025

## Supplementary Information

### **Interfacial Molecular Layer Induced by Trace Chlorogenic Acid for Highly Stable Zinc Anode**

Jinlong Zhang,<sup>†</sup> Bing Cai,<sup>†</sup> Qing Wu, Jun Huang\*

Department of Polymeric Materials & Engineering, College of Materials & Metallurgy,  
Guizhou University, Huaxi District, Guiyang 550025, P. R. China.

E-mail: huangj@gzu.edu.cn

[<sup>†</sup>] These authors contributed equally.

## **Experimental Section**

### **1) Chemicals and materials**

Chlorogenic acid (CGA, AR grade, 98%), zinc sulfate ( $\text{ZnSO}_4 \cdot 7\text{H}_2\text{O}$ , 99.995%), ammonium acetate ( $\text{CH}_3\text{COONH}_4$ , AR grade), and manganese acetate ( $(\text{CH}_3\text{COO})_2\text{Mn}$ , 98%) were purchased from Aladdin. Zinc foil (thickness of 100  $\mu\text{m}$ , 99.99%), copper foil (thickness of 90  $\mu\text{m}$ ), carbon cloth, and coin cells (CR2032) were all purchased from the Canrd company. Glass fiber separator (thickness of 0.29 mm, GF-A) was purchased from Olegee technology.

### **2) Preparation of the electrolytes**

The 1 M  $\text{ZnSO}_4$  was prepared by dissolving 2.8756 g  $\text{ZnSO}_4 \cdot 7\text{H}_2\text{O}$  into 10.0 mL deionized water. Different amounts (0.25 ~ 4.0 wt% of 2.8756 g  $\text{ZnSO}_4 \cdot 7\text{H}_2\text{O}$ , 7.2 ~ 115.0 mg) CGA were added to 10.0 mL of 1 M  $\text{ZnSO}_4$  solution to prepare CGA/ $\text{ZnSO}_4$  electrolytes at different concentrations. All prepared electrolytes are kept at room temperature without light.

### **3) Cell assembly**

Electrochemical performances were evaluated by CR-2032 coin-type cells, using pure 1 M  $\text{ZnSO}_4$  or 1 M CGA/ $\text{ZnSO}_4$  as the electrolyte, and glass fiber as the separator. The electrolyte volume is 120.0  $\mu\text{L}$  in one coin cell. Zn//Zn symmetric cells were assembled by using two bare Zn foils (1  $\text{cm}^2$ ). Zn//Cu asymmetric cells were assembled by using bare Cu foil as the working electrode and Zn foil as the counter electrode. Full cells were assembled by using a  $\text{MnO}_2$  electrode as the cathode and bare Zn foil as the anode. All cells are tested immediately after assembly, unless otherwise specified.

### **4) Material characterization**

The X-ray diffraction (XRD) patterns were collected on a German Bruker (D8 Advance) with Cu  $\text{K}\alpha$  radiation. The morphologies of the Zn metal were confirmed by scanning electron microscope (SEM). The deposition behavior of  $\text{Zn}^{2+}$  ions on Zn foil surfaces in different electrolytes was observed by optical microscopy in a homemade symmetric cell tester. The solvation structures of  $\text{Zn}^{2+}$  ions in various solutions were studied by Fourier-transform infrared spectroscopy (FTIR, Nicolet 6700). Raman spectroscopy analysis of the modified and unmodified electrolytes was performed using a Raman microscope system (LabRam HR Evolution). Laser confocal microscopy was used to observe the 3D reconstructed morphology of the Zn metal surface after cycling.

### **5) Electrochemical measurements**

The assembled Zn//Zn symmetric cells, Zn//Cu asymmetric cells, and Zn// $\text{MnO}_2$  full cells were tested on a battery test system (LAND CT3002A) for long-term cycling performance.

Other electrochemical data was tested using a CHI760E electrochemical workstation from Wuhan Corrtest Instruments Corp. In detail, the hydrogen evolution reactions (HER) of a two-electrode system, with a Zn plate as the reference electrode and working electrode, was investigated via linear sweep voltammetry (LSV) at a scanning rate of 5 mV s<sup>-1</sup> within the range of 0 to -0.4 V. Furthermore, these plots were obtained at a duration of 3600 s. The Tafel plot test involved a two-electrode system with a scanning rate of 1 mV s<sup>-1</sup>. The CV curves of the Zn//Cu asymmetric cells were recorded between -0.2 V and 0.4 V at a scanning rate of 0.5 mV s<sup>-1</sup>. Noteworthy, Zn//Zn symmetrical batteries were placed in a high and low-temperature chamber to test EIS spectra at different temperatures (40 ~ 90°C) over a frequency range of 10<sup>5</sup> to 1 Hz. The Zn//Cu asymmetric cells were cycled under various current densities with a charge cut-off voltage of 0.5 V, to get the coulombic efficiencies of Zn plating/stripping. Additionally, the electrochemical performance of the full cell was assessed through CV and GCD measurements, and the voltage windows for the full cells were 0.8 ~ 1.8 V. All electrochemical measurements were performed in the open air of a thermostatic room (25 ± 1 °C).

## Calculation section

### 1) The density functional theory (DFT) calculations

The density functional theory (DFT) calculations were performed using CASTEP package with the Perdew-Burke-Ernzerhof (PBE) generalized gradient approximation (GGA) exchange-correlation functional. Interactions between core and valance electrons were described using Vanderbilt ultra-soft pseudopotentials. The energy cut-off for the plane-wave basis set was 340 eV was adopted. The threshold values of the convergence criteria were specified as follows: 0.002 Å for maximum displacement, 0.05 eV/Å for the maximum force, 0.1 GPa for the maximum stress, 10<sup>-5</sup> eV/atom for energy, and 2.0 × 10<sup>-6</sup> eV/atom for self-consistent field tolerance. The 1.5 Å thickness of Zn(002) surface was cleaved. 20 Å vacuum space were implemented into the model to eliminate undesirable interactions between bottom side of the slab and the molecules in the vacuum space.

### 2) The binding energy ( $\Delta E_{\text{binding}}$ ) calculations

The binding energy ( $\Delta E_{\text{binding}}$ ) was calculated as:

$$\Delta E_{\text{binding}} = E_{\text{total}} - (E_{\text{vacancy}} + E_{\text{AA/EA/PA}})$$

where the  $E_{\text{total}}$  is the energy of the optimized system;  $E_{\text{vacancy}}$  is the energy of the vacancy structure;  $E_{\text{PZBGACl}}$  is the energy of an optimized AA, EA and PA molecule within a 10 Å × 10 Å × 10 Å box.

### 3) Theoretical Calculation Methods

DFT calculations were carried out using the Gaussian 09 program. Geometries of intermediates and transition states were optimized using the dispersion-corrected B3LYP-D3 functional with basis set of Def2svp for all atoms.

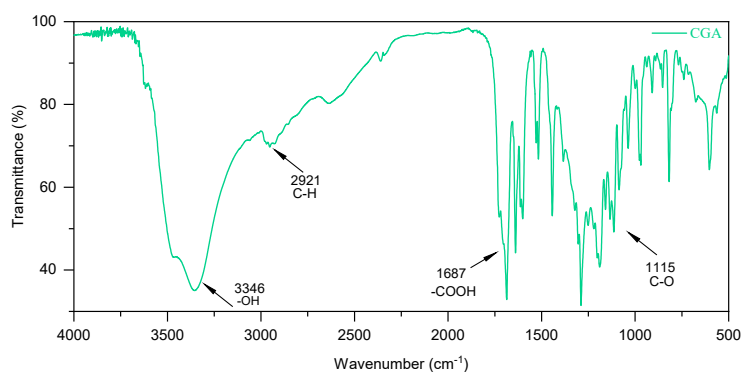

**Figure S1.** FTIR spectrum of CGA.

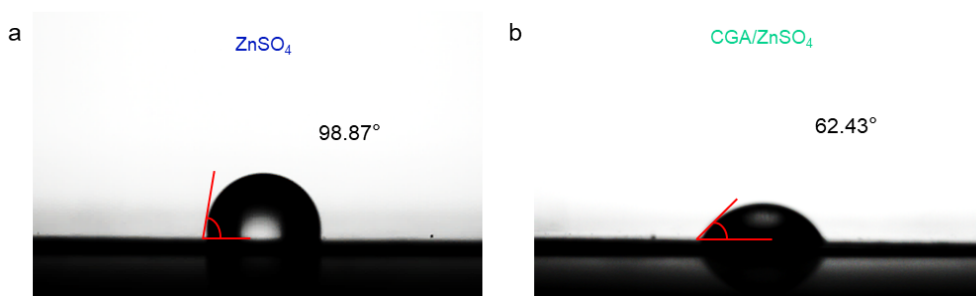

**Figure S2.** Contact angles of (a) ZnSO<sub>4</sub> and (b) CGA/ZnSO<sub>4</sub> electrolytes.

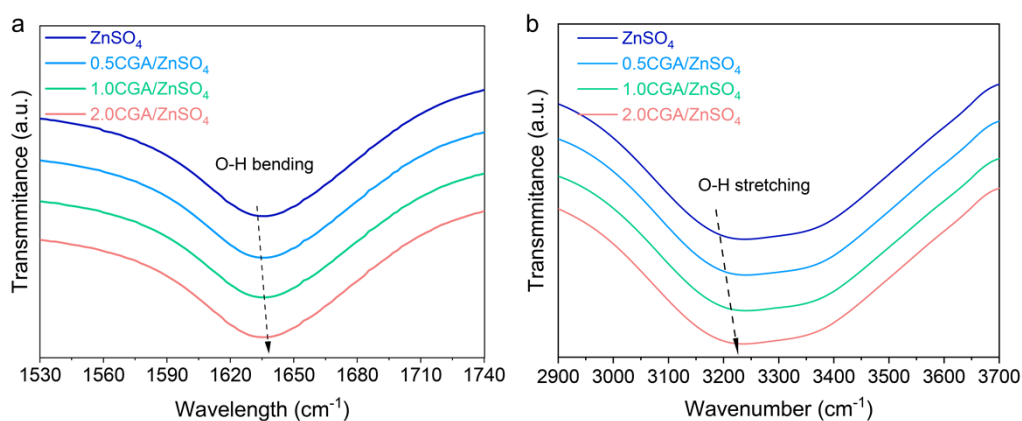

**Figure S3.** FTIR spectra of ZnSO<sub>4</sub> electrolyte with different ratios of CGA: (a) O-H bending and (b) O-H stretching.

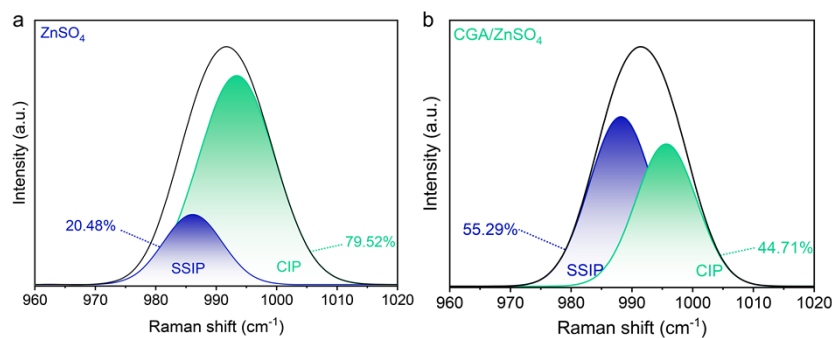

**Figure S4.** Raman spectra of  $\nu\text{-SO}_4^{2-}$  for (a)  $\text{ZnSO}_4$  and (b)  $\text{CGA/ZnSO}_4$  electrolytes.

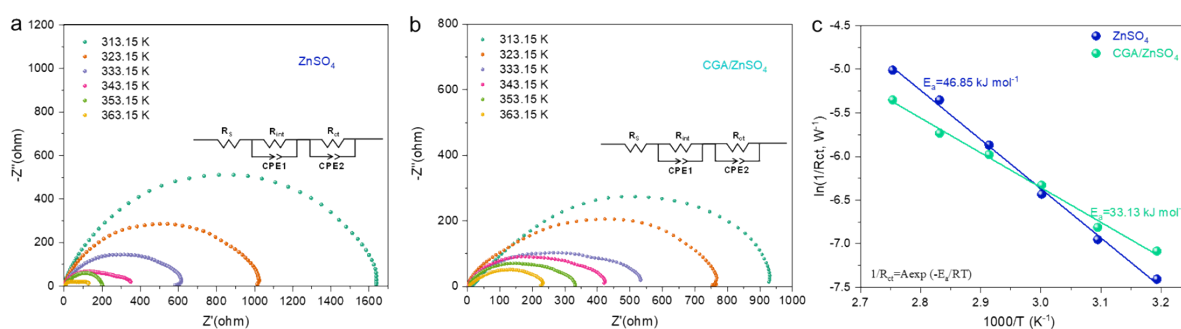

**Figure S5.** Nyquist plots of  $\text{Zn/Zn}$  symmetric cells under varying temperature conditions in (a)  $\text{ZnSO}_4$  and (b)  $\text{CGA/ZnSO}_4$  electrolytes. (c) Arrhenius behavior of temperature-dependent reciprocal resistances of  $\text{Zn}$  metal anode in  $\text{ZnSO}_4$  and  $\text{CGA/ZnSO}_4$  electrolytes.

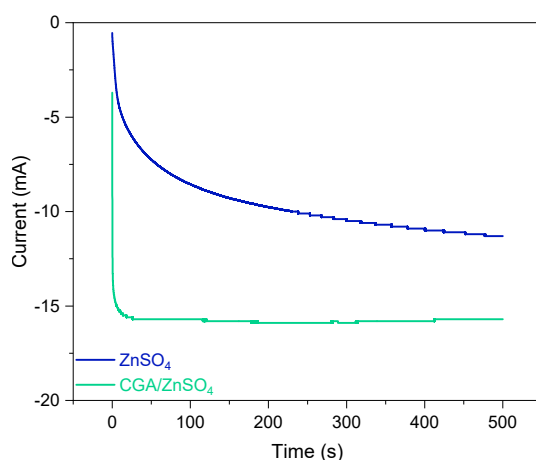

**Figure S6.** CA results of  $\text{Zn/Zn}$  symmetrical cells in  $\text{ZnSO}_4$  and  $\text{CGA/ZnSO}_4$  electrolytes.

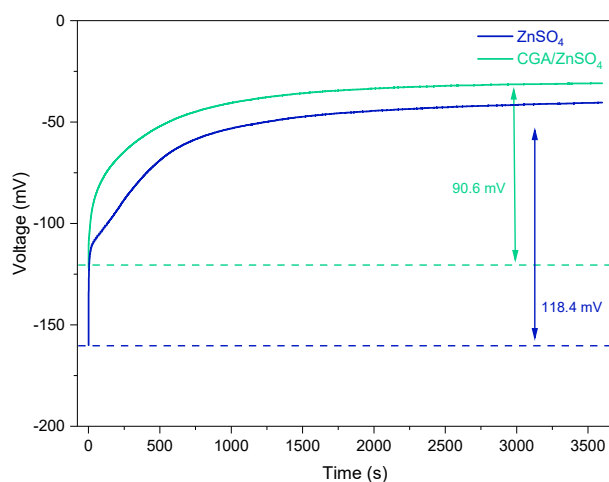

**Figure S7.** Initial Zn nucleation overpotential of Zn//Zn symmetric cells in ZnSO<sub>4</sub> and CGA/ZnSO<sub>4</sub> electrolytes.

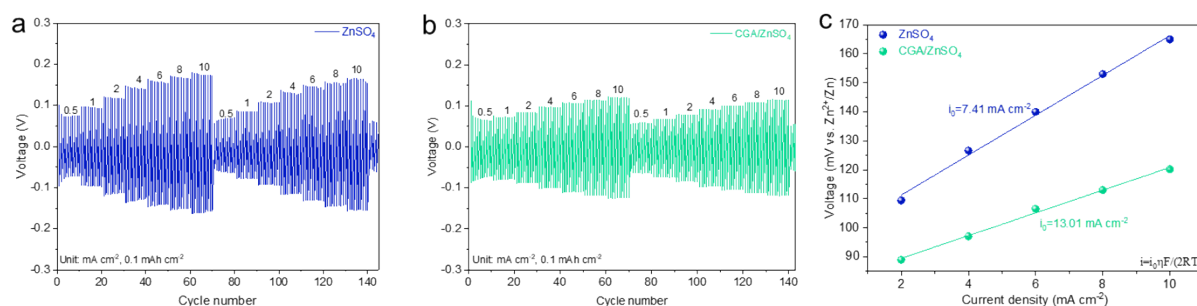

**Figure S8.** Rate performance of Zn//Zn symmetric cells during Zn stripping/plating at different current densities from 0.5 to 10 mA cm<sup>-2</sup> with the capacity of 0.1 mAh cm<sup>-2</sup> in (a) ZnSO<sub>4</sub> and (b) CGA/ZnSO<sub>4</sub> electrolytes. (c) The exchange current densities at different cycle numbers in ZnSO<sub>4</sub> and CGA/ZnSO<sub>4</sub> electrolytes.

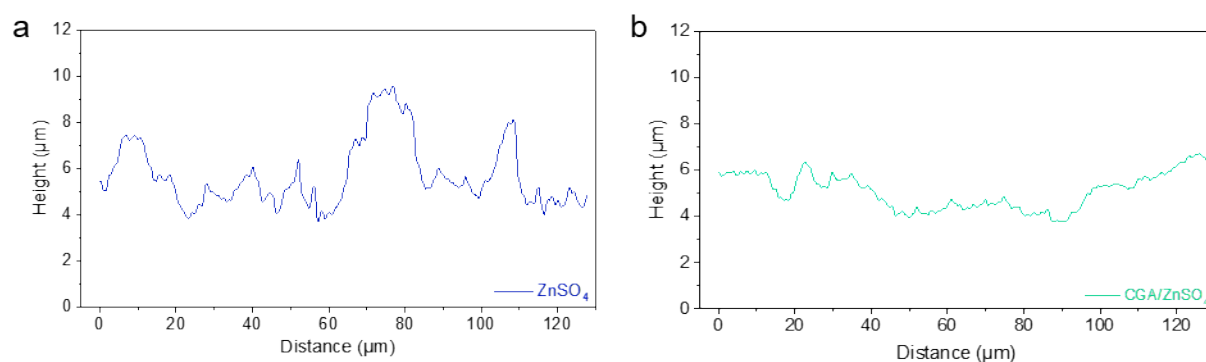

**Figure S9.** Height profile line of Zn metal anode after 15 cycles under 1 mA cm<sup>-2</sup>/1 mAh cm<sup>-2</sup> in (a) ZnSO<sub>4</sub> and (b) CGA/ZnSO<sub>4</sub> electrolytes.

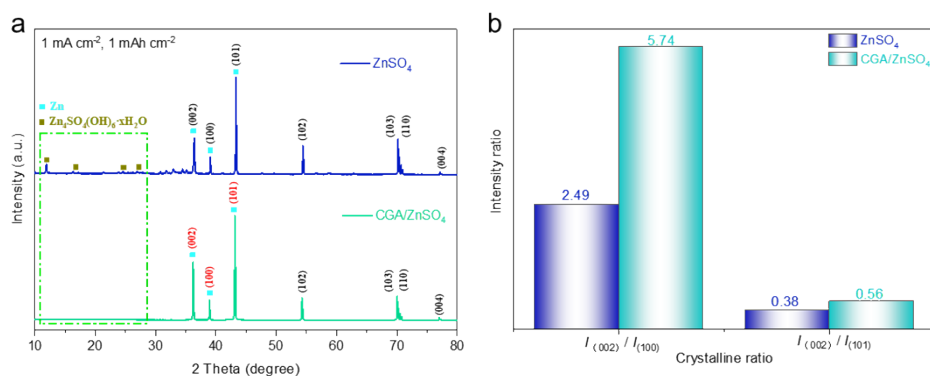

**Figure S10.** (a) XRD patterns of cycled Zn metal anode in ZnSO<sub>4</sub> and CGA/ZnSO<sub>4</sub> electrolytes at 1 mA cm<sup>-2</sup> and 1 mAh cm<sup>-2</sup> for 100 h. (b) Intensity ratios of the (002) crystal plane to (101) and (100) crystal plane of the Zn metal anode in ZnSO<sub>4</sub> and CGA/ZnSO<sub>4</sub> electrolytes.

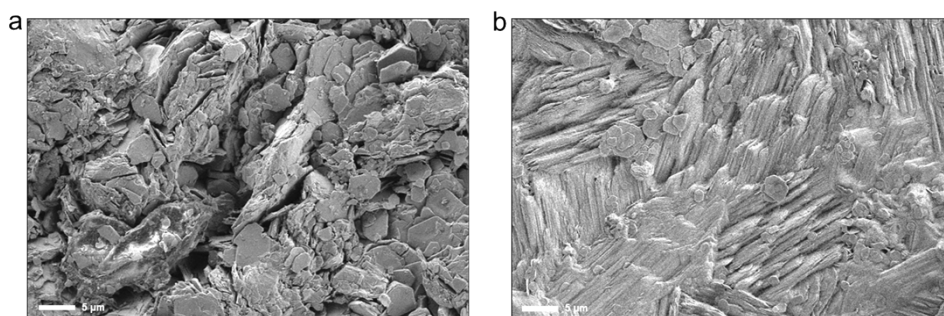

**Figure S11.** SEM images of cycled Zn metal anodes in (a) ZnSO<sub>4</sub> and (b) CGA/ZnSO<sub>4</sub> electrolytes at 1 mA cm<sup>-2</sup> and 1 mAh cm<sup>-2</sup> for 100 h.

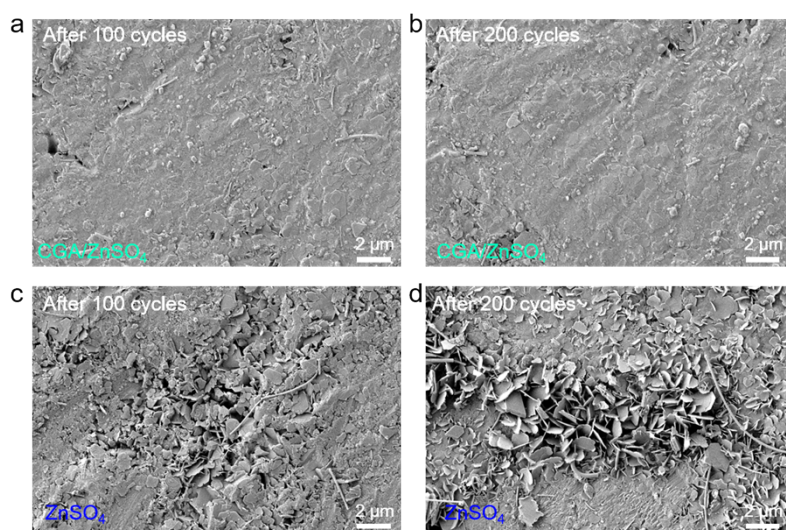

**Figure S12.** SEM images of cycled Zn anodes in CGA/ZnSO<sub>4</sub> electrolyte for (a) 100, (b) 200 cycles and in ZnSO<sub>4</sub> electrolyte for (c) 100, (d) 200 cycles at 5 mA cm<sup>-2</sup>/1 mAh cm<sup>-2</sup>.

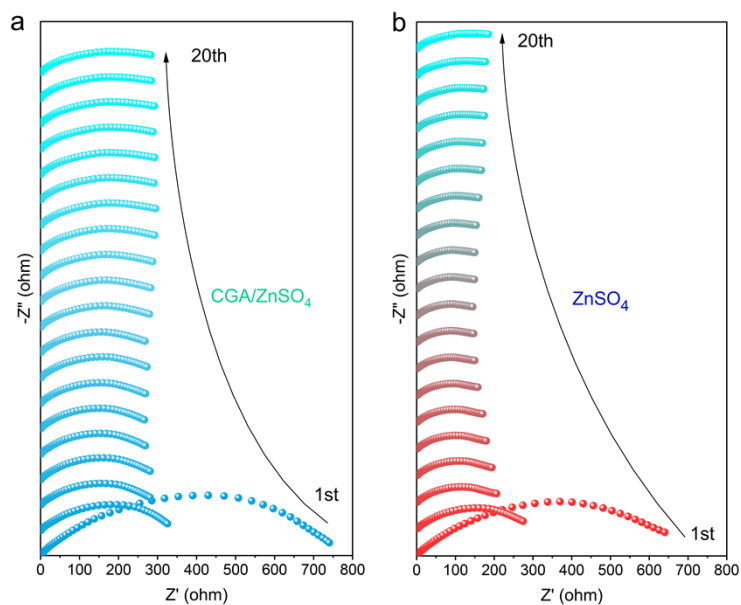

**Figure S13.** *In-situ* EIS of Zn//Zn symmetric cells with (a) CGA/ZnSO<sub>4</sub> and (b) ZnSO<sub>4</sub> electrolytes cycled at 1 mA cm<sup>-2</sup> and 1 mAh cm<sup>-2</sup> for 20 cycles.

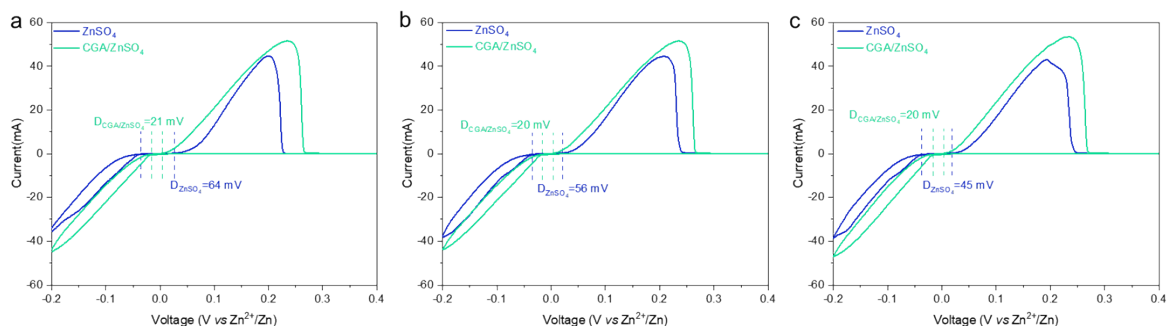

**Figure S14.** CV curves for Zn plating/stripping of Zn//Cu asymmetric cells in ZnSO<sub>4</sub> and CGA/ZnSO<sub>4</sub> electrolytes at (a) 1<sup>st</sup>, (b) 10<sup>th</sup>, (c) 20<sup>th</sup> cycles.

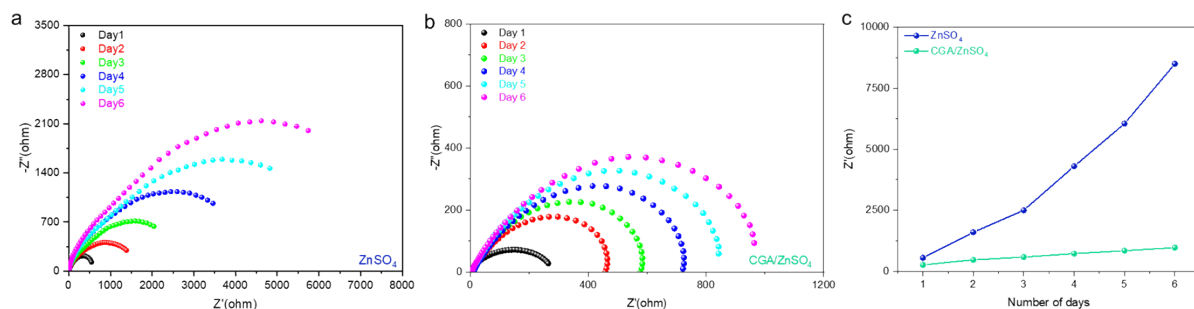

**Figure S15.** EIS of the Zn//Zn symmetric cells at different days in (a) ZnSO<sub>4</sub> and (b) CGA/ZnSO<sub>4</sub> electrolytes and (c) their comparison.



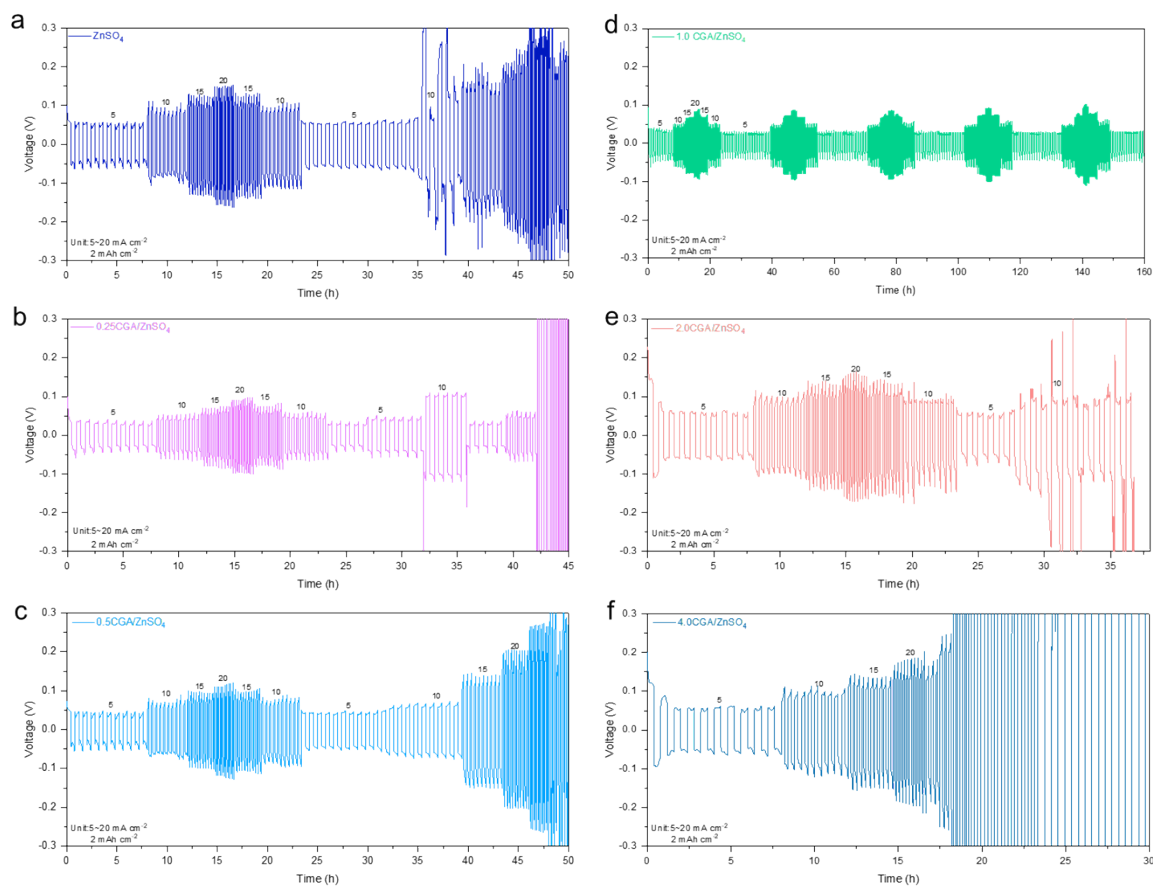

**Figure S16.** Rate performance of Zn//Zn symmetric cells during Zn plating/stripping at different current densities from 5 to 20 mA cm<sup>-2</sup> with the capacity of 2 mAh cm<sup>-2</sup> in (a) ZnSO<sub>4</sub>, (b) 0.25CGA/ZnSO<sub>4</sub>, (c) 0.5CGA/ZnSO<sub>4</sub>, (d) 1.0CGA/ZnSO<sub>4</sub>, (e) 2.0CGA/ZnSO<sub>4</sub>, and (f) 4.0CGA/ZnSO<sub>4</sub> electrolytes.

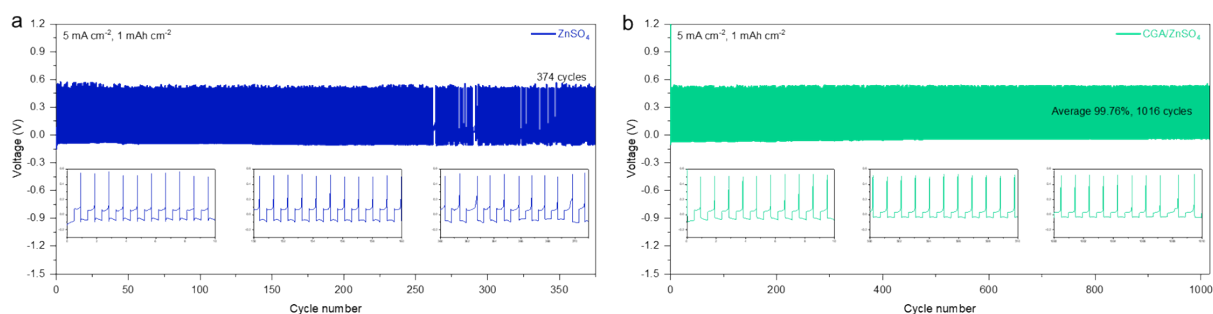

**Figure S17.** Charge/discharge curves of Zn//Cu asymmetric cells at 5 mA cm<sup>-2</sup> with 1 mAh cm<sup>-2</sup> in (a) ZnSO<sub>4</sub> and (b) CGA/ZnSO<sub>4</sub> electrolytes.

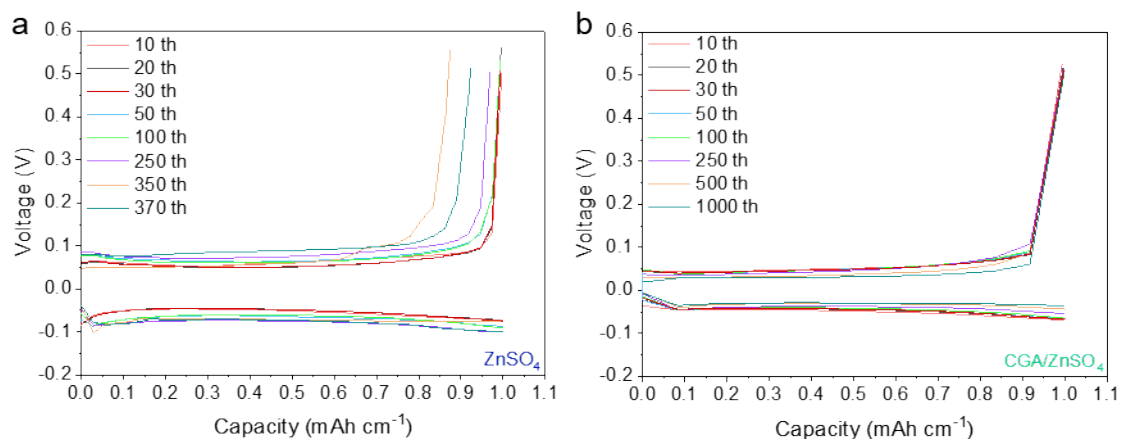

**Figure S18.** Capacity-voltage curves of Zn//Cu asymmetric cells at the selected cycles at 5 mA cm<sup>-2</sup> with 1 mAh cm<sup>-2</sup> in (a) ZnSO<sub>4</sub> and (b) CGA/ZnSO<sub>4</sub> electrolytes.

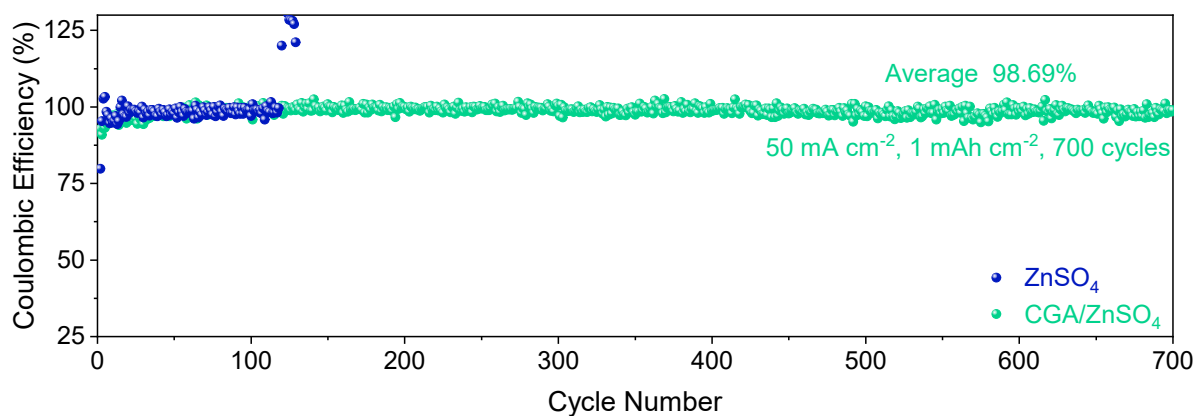

**Figure S19.** Comparison of Zn plating/stripping efficiency at 50 mA cm<sup>-2</sup> with 1 mAh cm<sup>-2</sup> in Zn//Cu asymmetric cells in ZnSO<sub>4</sub> and CGA/ZnSO<sub>4</sub> electrolytes.

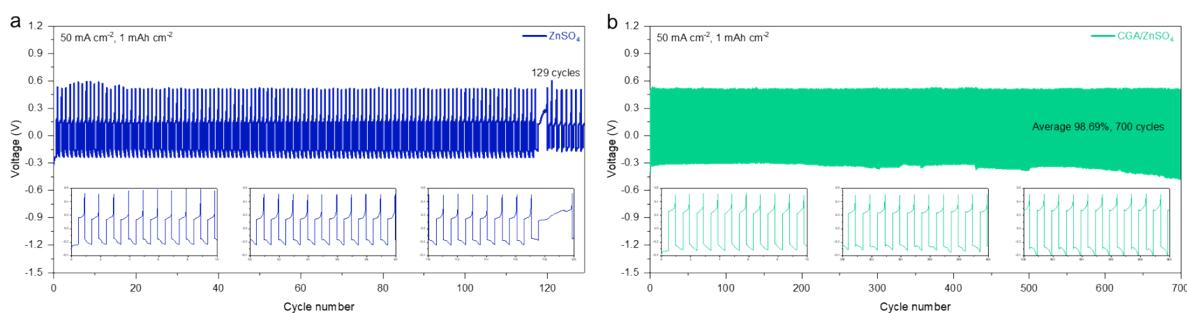

**Figure S20.** Charge/discharge curves of Zn//Cu asymmetric cells at 50 mA cm<sup>-2</sup> with 1 mAh cm<sup>-2</sup> in (a) ZnSO<sub>4</sub> and (b) CGA/ZnSO<sub>4</sub> electrolytes.

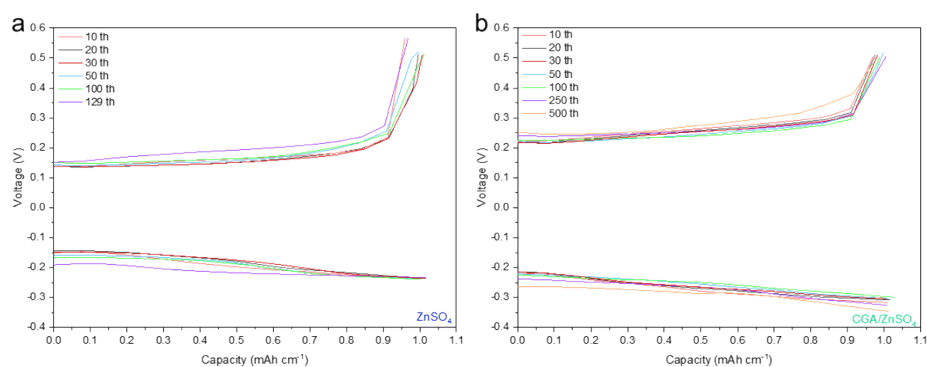

**Figure S21.** Capacity-voltage curves of Zn//Cu asymmetric cells at the selected cycles at 50 mA cm<sup>-2</sup> with 1 mAh cm<sup>-2</sup> in (a) ZnSO<sub>4</sub> and (b) CGA/ZnSO<sub>4</sub> electrolytes.

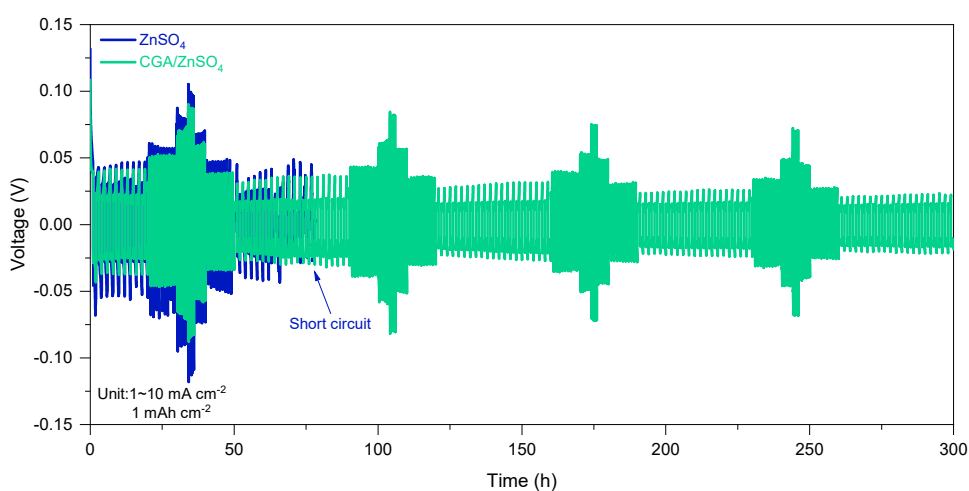

**Figure S22.** Rate performance of Zn//Zn symmetric cells during Zn plating/stripping at different current densities from 1 to 10 mA cm<sup>-2</sup> with the capacity of 1 mAh cm<sup>-2</sup> in ZnSO<sub>4</sub> and CGA/ZnSO<sub>4</sub> electrolytes.

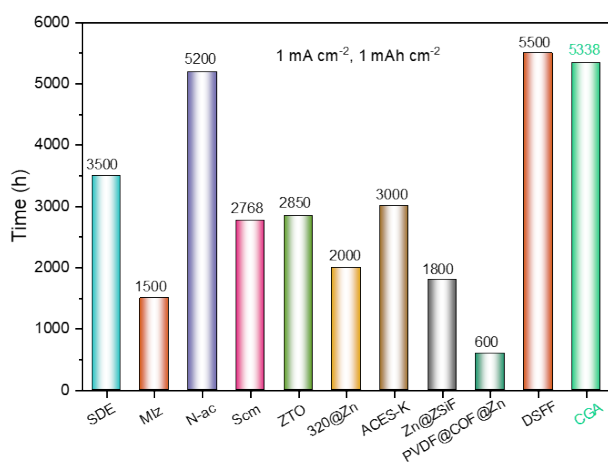

**Figure S23.** Performance comparison of Zn//Zn symmetric cells cycled at 1 mA cm<sup>-2</sup> and 1 mAh cm<sup>-2</sup> in this work with the previously reported works.

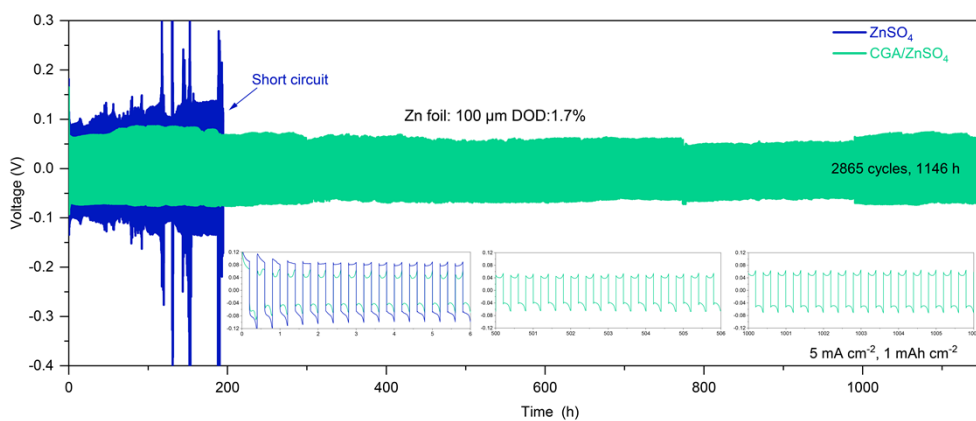

**Figure S24.** Long-term cycling performance of Zn//Zn symmetric cells at  $5 \text{ mA cm}^{-2}$  with the plating/stripping capacity of  $1 \text{ mAh cm}^{-2}$  in  $\text{ZnSO}_4$  and  $\text{CGA/ZnSO}_4$  electrolytes.

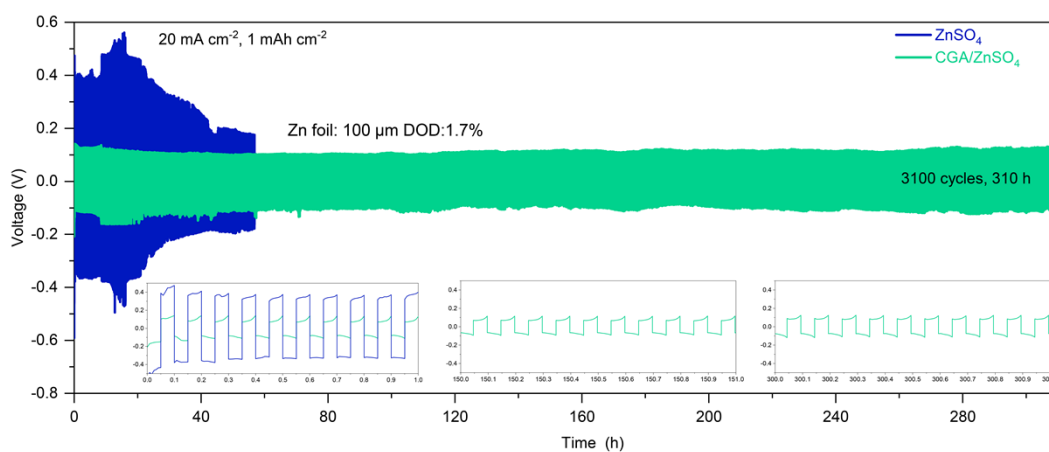

**Figure S25.** Long-term cycling performance of Zn//Zn symmetric cells at  $20 \text{ mA cm}^{-2}$  with the plating/stripping capacity of  $1 \text{ mAh cm}^{-2}$  in  $\text{ZnSO}_4$  and  $\text{CGA/ZnSO}_4$  electrolytes.

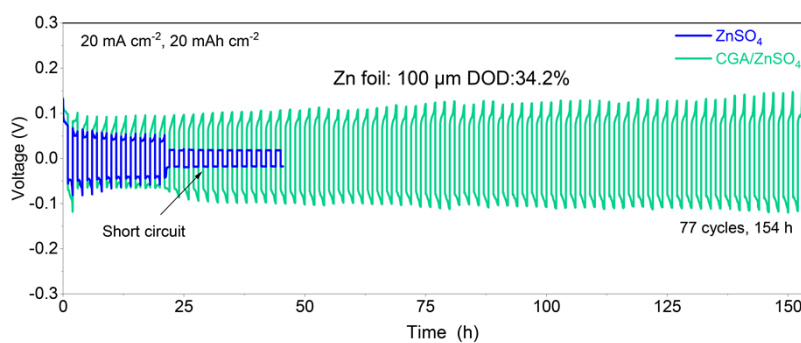

**Figure S26.** Long-term cycling performance of Zn//Zn symmetric cells at  $20 \text{ mA cm}^{-2}$  with the plating/stripping capacity of  $20 \text{ mAh cm}^{-2}$  in  $\text{ZnSO}_4$  and  $\text{CGA/ZnSO}_4$  electrolytes.

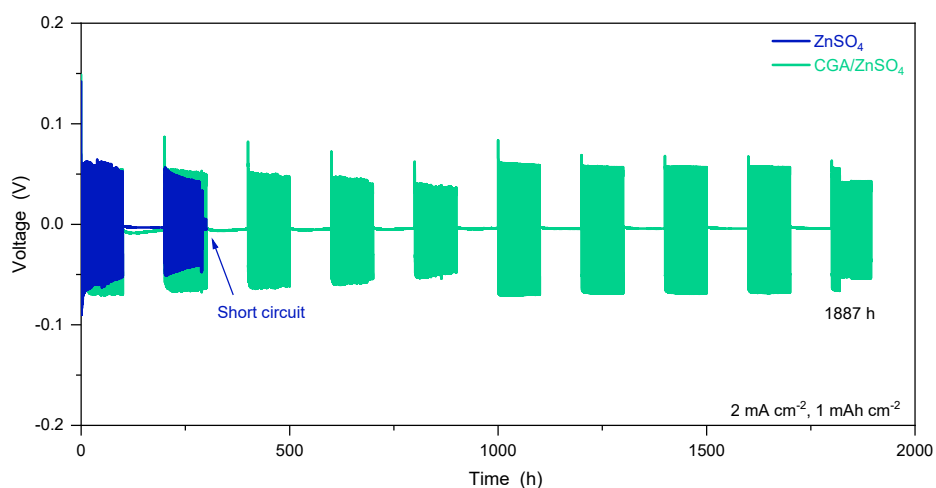

**Figure S27.** The shelving-recovery performances of Zn//Zn symmetric cells at  $2 \text{ mA cm}^{-2}$  and  $1 \text{ mAh cm}^{-2}$  in  $\text{ZnSO}_4$  and  $\text{CGA/ZnSO}_4$  electrolytes.

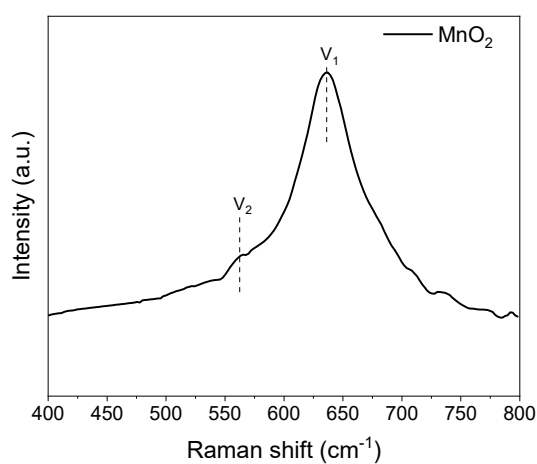

**Figure S28.** Raman spectra of the  $\text{MnO}_2$  electrode.

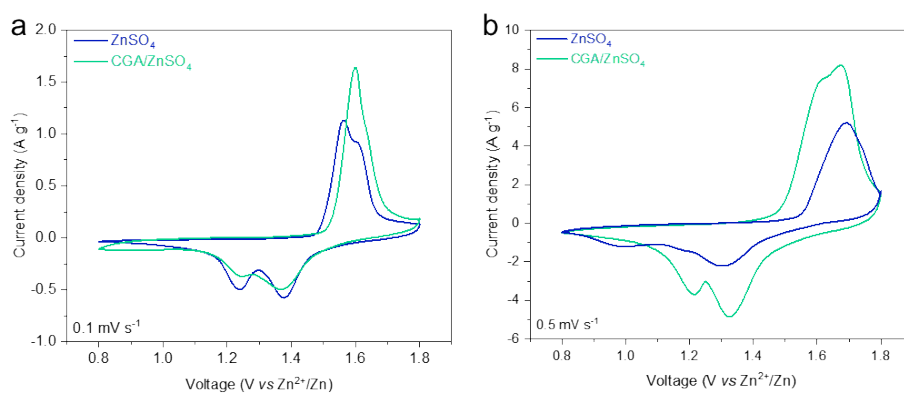

**Figure S29.** CV curves of full cells using  $\text{MnO}_2$  as cathode and Zn foil as anode in  $\text{ZnSO}_4$  and  $\text{CGA/ZnSO}_4$  electrolytes at (a)  $0.1 \text{ mV s}^{-1}$  and (a)  $0.5 \text{ mV s}^{-1}$ .

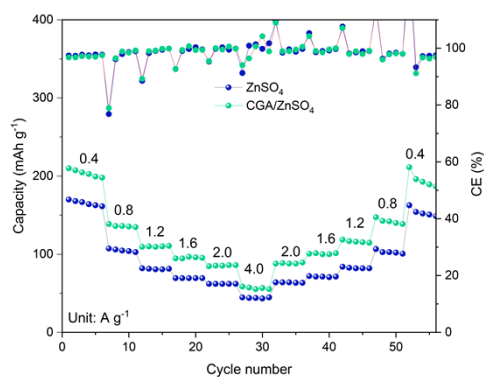

**Figure S30.** Rate capabilities and CE of Zn//MnO<sub>2</sub> full cells.

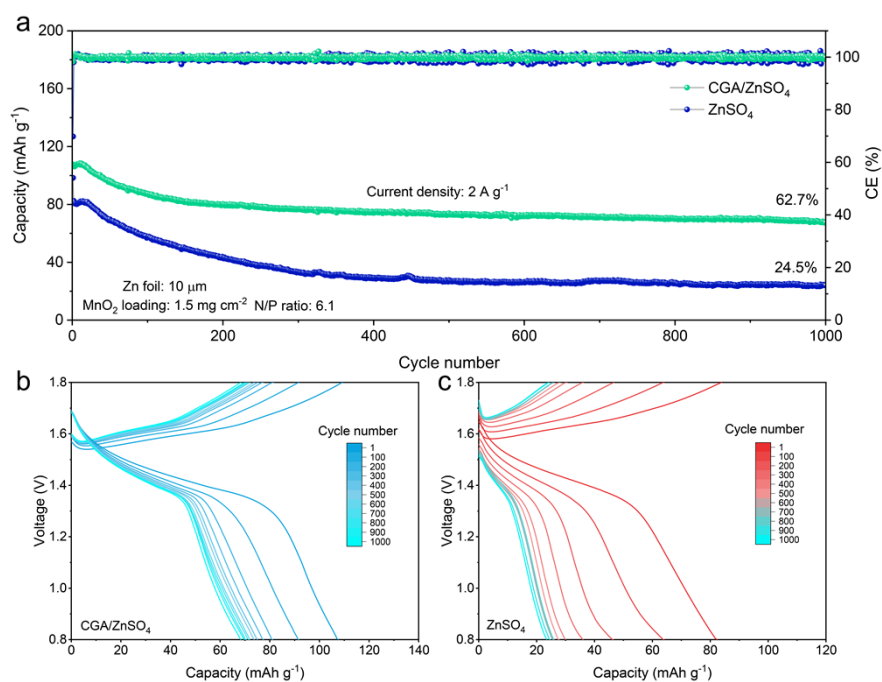

**Figure S31.** (a) Capacity retentions and corresponding charge/discharge voltage profiles of Zn//MnO<sub>2</sub> full cells with (b) CGA/ZnSO<sub>4</sub> and (c) ZnSO<sub>4</sub> electrolytes.

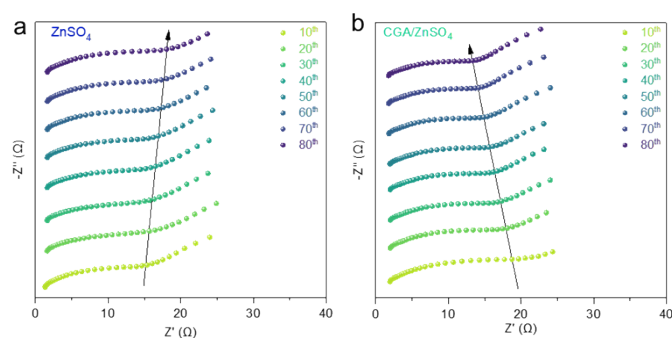

**Figure S32.** *In situ* EIS curves of full cells at different cycle numbers in (a) ZnSO<sub>4</sub> and (b) CGA/ZnSO<sub>4</sub> electrolytes.

**Table S1.** Performance comparison of Zn//Zn symmetric cells cycled at 1 mA cm<sup>-2</sup> and 1 mAh cm<sup>-2</sup> in this work with the previously reported works. The complete designations for the abbreviations listed under the "Additive", "Protective layer" and "Co-solvent electrolyte" column are 2, 2'-Sulfonyldiethanol (SDE)<sup>1</sup>, 2-methylimidazole (MIz)<sup>2</sup>, N-Acetyl-ε-caprolactam (N-ac)<sup>3</sup>, straight-chain molecule (Scm)<sup>4</sup>, ZnTiO<sub>3</sub> (ZTO)<sup>5</sup>, COF-320N (320N@Zn)<sup>6</sup>, acesulfame potassium (ACES-K)<sup>7</sup>, ammonium fluosilicate (ZSiF)<sup>8</sup>, polyvinylidene fluoride @ covalent organic framework (PVDF@COF@Zn)<sup>9</sup>, Dimethyl sulfoxide-trifluoroethyl formate (DSFF)<sup>10</sup>.

| Test condition                                    | Modified type                                          | Lifespan (h) | Ref.                                               |
|---------------------------------------------------|--------------------------------------------------------|--------------|----------------------------------------------------|
| 1 mA cm <sup>-2</sup> ,<br>1 mAh cm <sup>-2</sup> | <b>Additive</b><br>(SDE) <sup>1</sup>                  | 3500         | Angew. Chem. Int. Ed. 2024, <b>63</b> , e202411470 |
|                                                   | <b>Additive</b><br>(MIz) <sup>2</sup>                  | 1500         | ACS Nano 2024, <b>18</b> , 16610                   |
|                                                   | <b>Additive</b><br>(N-ac) <sup>3</sup>                 | 5200         | Angew. Chem. Int. Ed. 2024, <b>63</b> , e202402833 |
|                                                   | <b>Additive</b><br>(Scm) <sup>4</sup>                  | 2768         | Angew. Chem. Int. Ed. 2024, 10.1002/anie.202421787 |
|                                                   | <b>Protective layer</b><br>(ZTO) <sup>5</sup>          | 2850         | Adv. Energy Mater. 2025, 10.1002/aenm.202405804    |
|                                                   | <b>Protective layer</b><br>(320N@Zn) <sup>6</sup>      | 2000         | Angew. Chem. Int. Ed. 2025, 10.1002/anie.202424184 |
|                                                   | <b>Additive</b><br>(ACES-K) <sup>7</sup>               | 3000         | Angew. Chem. Int. Ed. 2025, 10.1002/anie.202422036 |
|                                                   | <b>Protective layer</b><br>(Zn@ZSiF) <sup>8</sup>      | 1800         | Angew. Chem. Int. Ed. 2025, 10.1002/anie.202423244 |
|                                                   | <b>Protective layer</b><br>(PVDF@COF@Zn) <sup>9</sup>  | 600          | Electrochim. Acta, 2024, 506, 145059               |
|                                                   | <b>Co-solvent electrolytes</b><br>(DSFF) <sup>10</sup> | 5500         | Joule, 2025, 9, 101844                             |
|                                                   | <b>Additive</b><br>(Chlorogenic acid)                  | 5340         | <i>This work</i>                                   |

## References

- 1 T. Yan, B. Wu, S. Liu, M. Tao, J. Liang, M. Li, C. Xiang, Z. Cui, L. Du, Z. Liang, H. Song, *Angew. Chem. Int. Ed.* 2024, **63**, e202411470
- 2 J. Cao, M. Sun, D. Zhang, Y. Zhang, C. Yang, D. Luo, X. Yang, X. Zhang, J. Qin, B. Huang, Z. Zeng, J. Lu, *ACS Nano* 2024, **18**, 16610
- 3 D. Xu, X. Ren, H. Li, Y. Zhou, S. Chai, Y. Chen, H. Li, L. Bai, Z. Chang, A. Pan, H. Zhou, *Angew. Chem. Int. Ed.* 2024, **63**, e202402833
- 4 F. Wu, J. Zhang, L. Ma, P. Ruan, Y. Chen, S. Meng, R. Yin, W. Shi, W. Liu, J. Zhou, X. Cao, *Angew. Chem. Int. Ed.* 2024, **64**, e202421787
- 5 Y. Li, B. Ping, J. Qu, J. Ren, C. Lin, J. Lei, J. Chen, J. Li, R. Liu, X. Long, X. Guo, D. Luo, Z. Chen, *Adv. Energy Mater.* 2025, doi: 10.1002/aenm.202405804
- 6 S. Zhang, J. Chen, W. Chen, Y. Su, Q. Gou, R. Yuan, Z. Wang, K. Wang, W. Zhang, X. Hu, Z. Zhang, P. Wang, F. Wan, J. Liu, B. Li, Y. Wang, G. Zheng, M. Li, and J. Sun, *Angew. Chem. Int. Ed.* 2025, doi: 10.1002/anie.202424184
- 7 G. Qu, Y. Zhao, C. Li, Y. Zhai, Y. Kong, X. He, L. Kong, C. Wang, M. Chen, K. Song, Z. Liu, L. Xu, *Angew. Chem. Int. Ed.* 2025, doi: 10.1002/anie.202422036
- 8 G. Yin, H. Wang, M. Zhou, T. Long, M. Ding, B. Xie, X. Wu, J. Li, W. Ling, J. Dai, X. Zeng, *Angew. Chem. Int. Ed.* 2025, doi: 10.1002/anie.202423244
- 9 V. Aupama, J. Sangsawang, W. Kao-ian, S. Wannapaiboon, J. Pimoei, W. yoopensuk, M. Opchoei, Z. Tehrani, S. Margadonna, S. Kheawhom, *Electrochimica Acta.* 2024, **506**, 145059
- 10 J. Heo, D. Dong, Z. Wang, F. Chen, C. Wang, *Joule* **9**, 101844
